# Supplementary material
Source: PubMed Central journal article supplement (PMC2892261)
Supplement: NIHMS210770-supplement-1_si_001.pdf [file NIHMS210770-supplement-1_si_001.pdf]

## Supporting Information

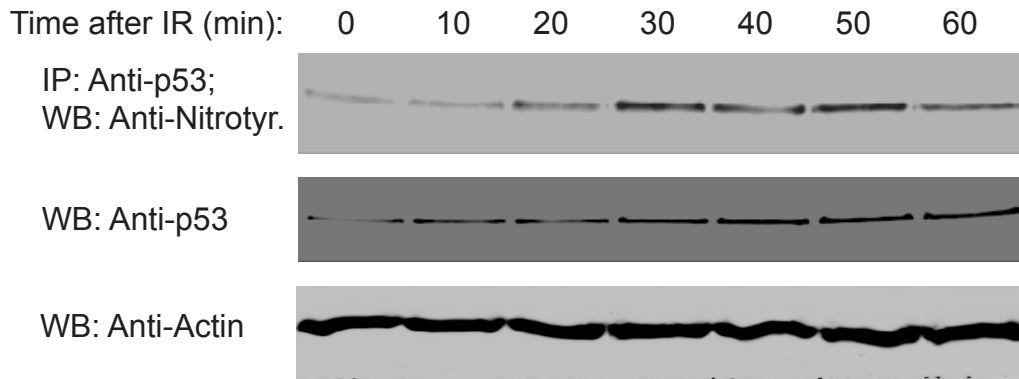

**Figure S1.** Tyr nitration and phosphorylation of endogenous p53 after radiation. MCF-7 cells were irradiated at 5 Gy and cell lysates were prepared at the indicated time-points for analysis of Tyr nitration and total p53 accumulation. Actin expression was shown as a loading control. NO-donor stimulated nitration was analyzed by IP with anti-p53 IgG and WB with anti-NitroTyr IgG.

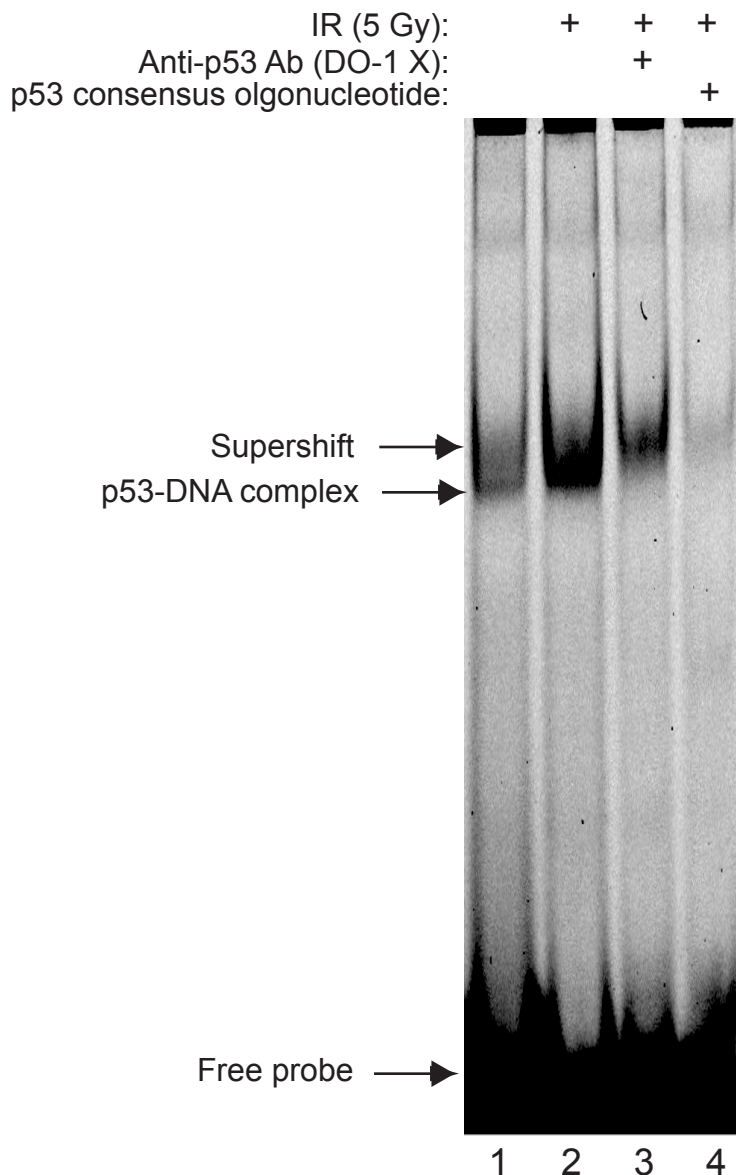

**Fig. S2.** Gel mobility shift, supershift, and “cold oligonucleotide” control. DNA-binding activity of endogenous p53 in MCF-7 cells was analyzed by EMSA. 5 $\mu$ g of the nuclear extract from non-irradiated (lane 1) and irradiated cells (2 h after IR, lanes 2-4) was used. p53 specific antibody DO-1 was added to supershift p53-DNA complex (lane 3). p53 consensus oligonucleotide was used to indicate specific p53-DNA binding (lane 4). Migration positions of free probe, p53-DNA, and DO-1 Ab-p53-DNA complexes are shown.

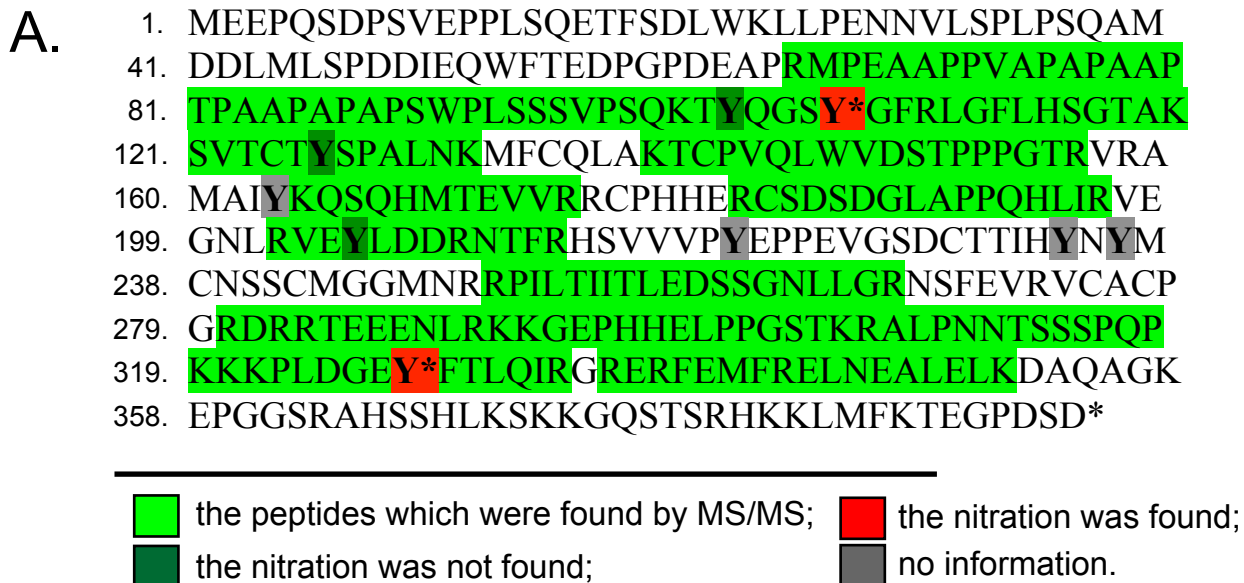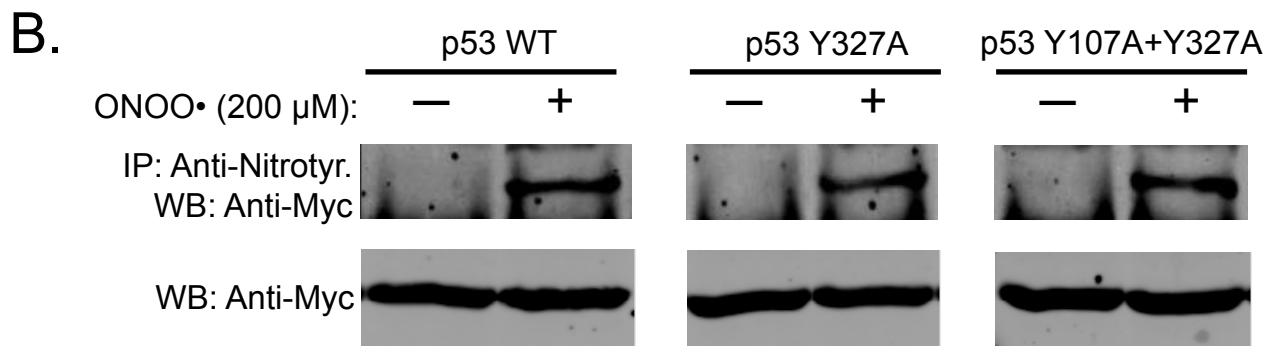

**Figure S3.** p53 Tyr nitration in vitro. (A) p53 sequence and mass spectrometry results; (B) MCF-7 cells were transfected with equal amounts of Myc-tagged p53 WT and indicated mutants. Cell lysates were nitrated with 200 μM peroxynitrite and anti-nitroTyr immunoprecipitates analyzed by Western Blot with anti-Myc antibody. All top panels are from the same blot. Total cell lysates were also probed with anti-Myc-tag antibody for Myc-tagged p53 expression and loading control (bottom panels).

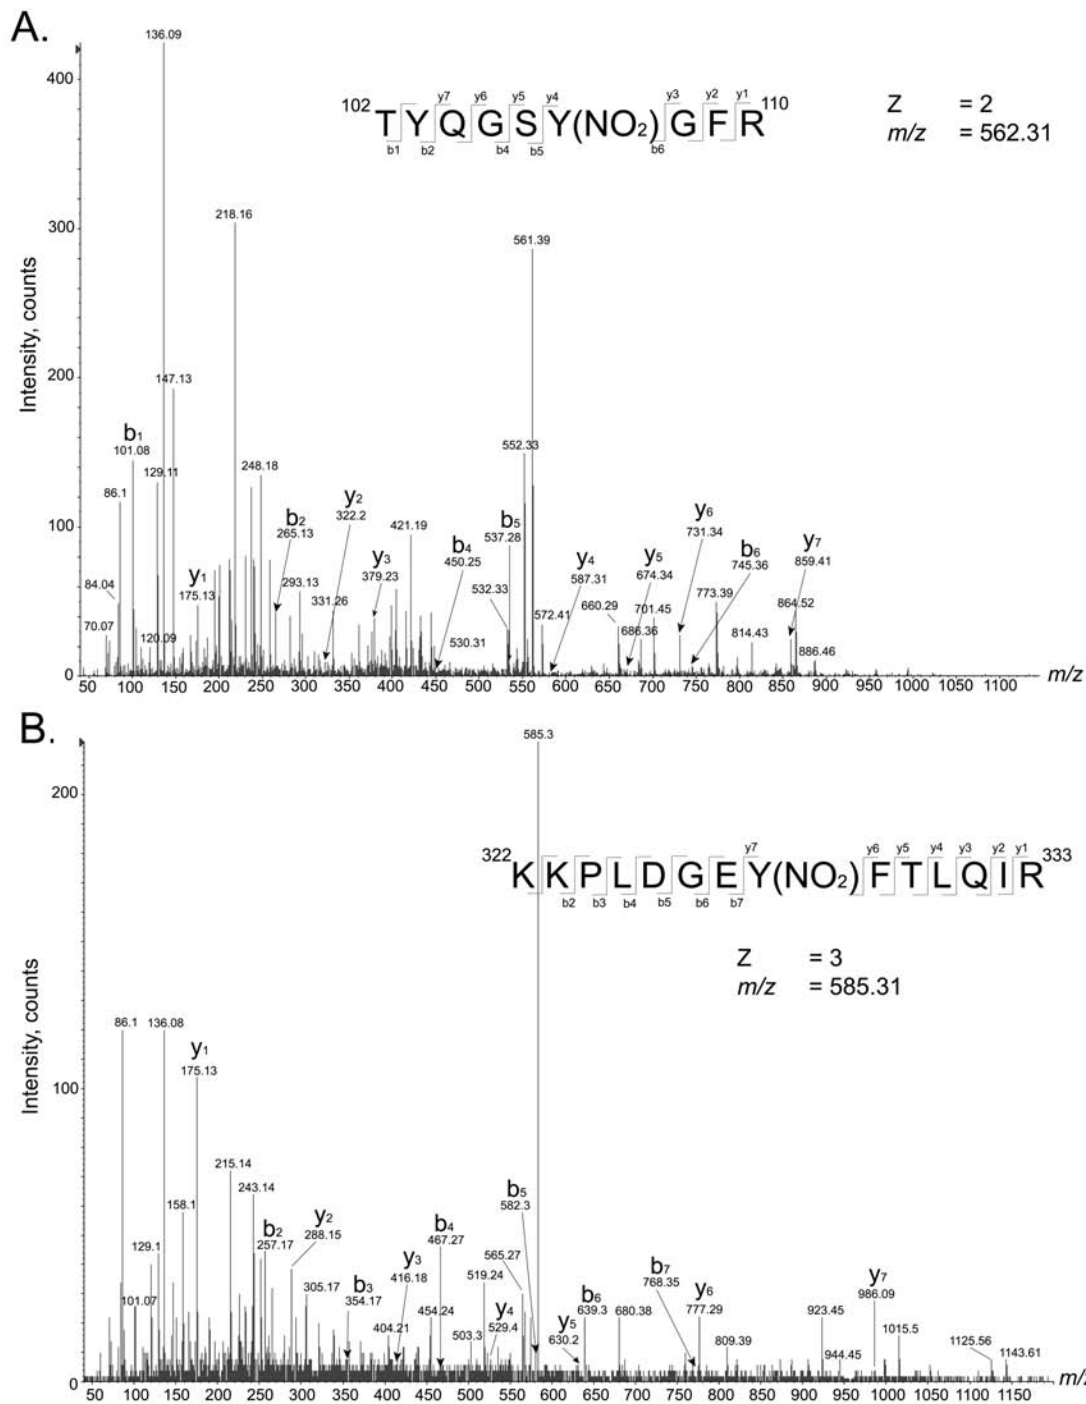

**Figure S4.** Tandem mass spectrum of the peptides contained Nitro-Tyrosines. (A) The peptide  $^{102}\text{TYQGSY(NO}_2\text{)GFR}^{110}$  with nitrated Tyr107; (B) The peptide  $^{320}\text{KKPLDGEY(NO}_2\text{)FTLQIR}^{333}$  with nitrated Tyr327. The modified peptide was manually verified. The sequence-specific ions are labeled as y and b ions on the spectra.

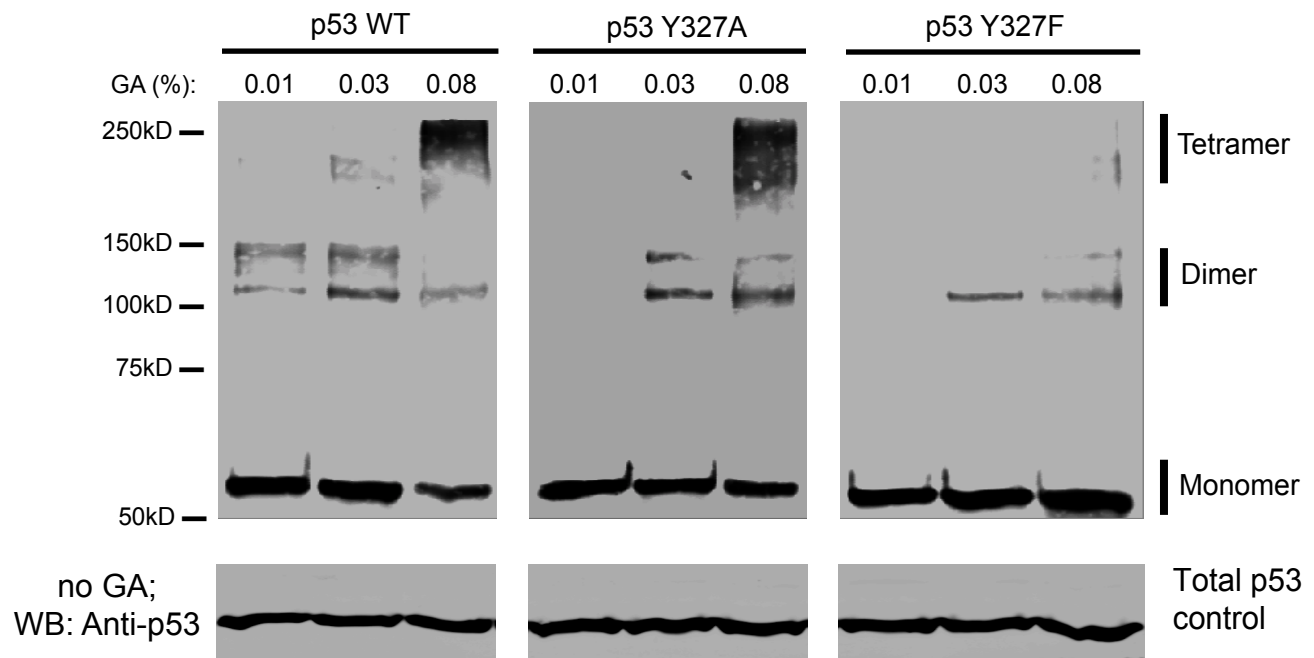

**Figure S5.** Tetramerization activity of overexpressed p53 WT, Y327A, and Y327F mutants. Saos-2 cells were transfected with the same amount of p53 WT or indicated mutants. 24 h after transfection cells were lysed. Equal amounts of the cell lysates were treated with indicated concentrations of glutaraldehyde. All panels are from the same blot. GA – glutaraldehyde; Tetramerization of p53 was assessed as described in Methods.

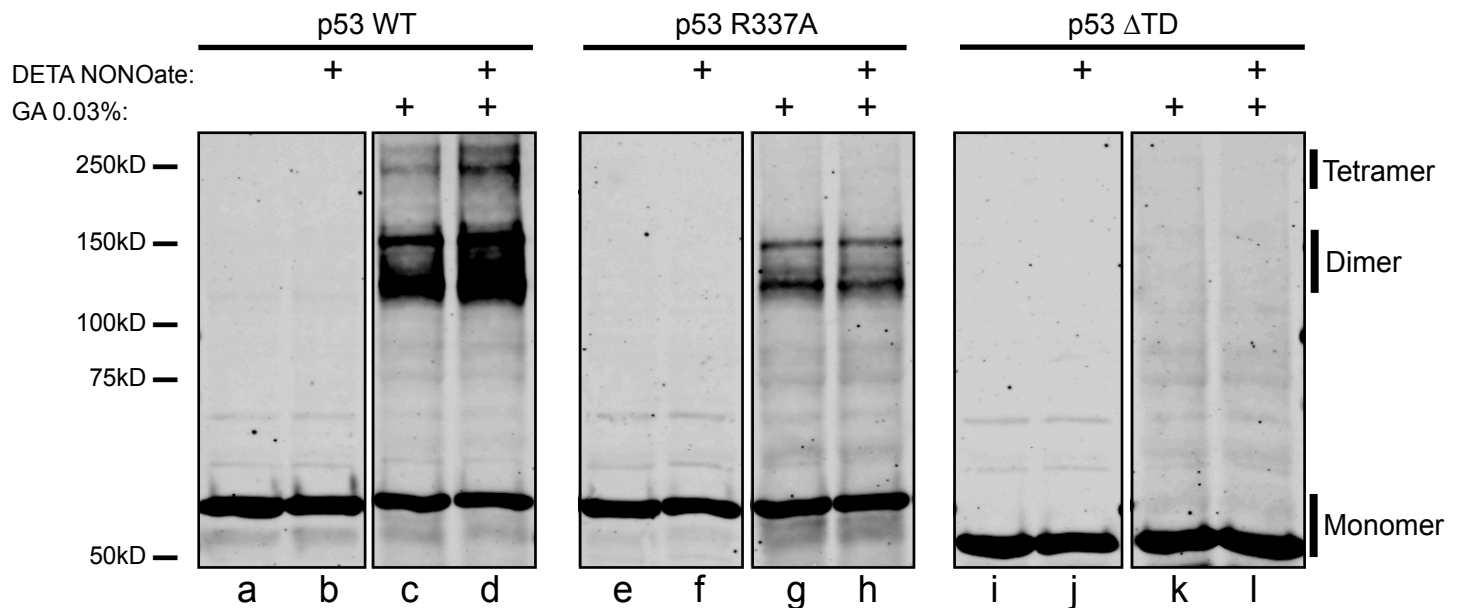

**Figure S6.** Incubation with DETA NONOate stimulates tetramerization of WT p53, but not Arg337Ala or ΔTD mutants. Saos-2 cells were transfected with identical amounts of p53 WT and mutants. Twenty-four h after transfection, cells were incubated with 200 μM DETA NONOate for 4 h. All panels are from the same blot. GA – glutaraldehyde; Tetramerization of p53 was assessed as described in Methods.

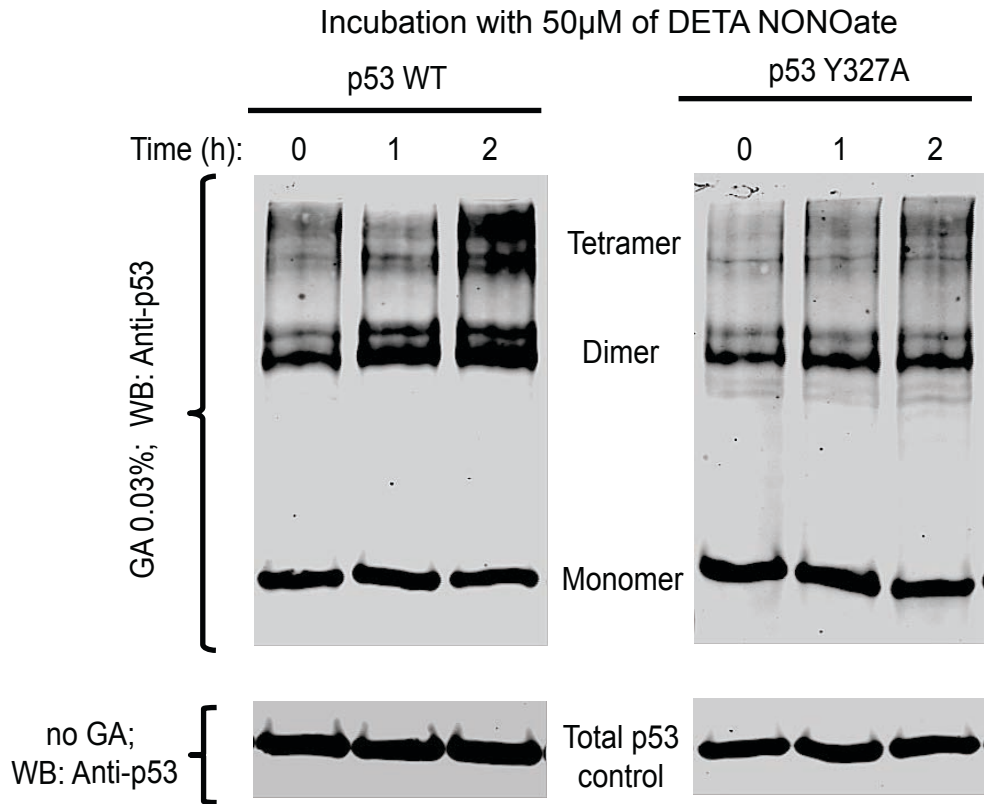

**Figure S7.** Stimulation of p53 WT tetramerization by 50 $\mu$ M of DETA NONOate. Saos-2 cells were transfected with identical amounts of p53 WT and mutant. Twenty-four h after transfection cells were incubated with 50  $\mu$ M DETA NONOate and samples were collected at the indicated time-points. p53 Y327A was used as a negative control. All panels are from the same blot. GA – glutaraldehyde; Tetramerization of p53 was assessed as described in Methods.

**Table S1.** Mass spectroscopy results for p53 protein: observed m/z values and their corresponding A.A. sequence.

| Amino Acids | Peptide Sequence                     | Calculated m/z | Observed m/z        | Ion Charge                    | Modifications   |
|-------------|--------------------------------------|----------------|---------------------|-------------------------------|-----------------|
| 66-101      | MPEAAPPVAPAPAAPTPAAPAPAPSWPLSSSVPSQK | 861.69         | 861.98              | MH <sub>4</sub> <sup>4+</sup> | None            |
| 102-110     | TYQGSYGFR                            | 539.75         | 539.78              | MH <sub>2</sub> <sup>2+</sup> | None            |
| 102-110     | TYQGSY*GFR                           | 539.75         | 562.31 <sup>#</sup> | MH <sub>2</sub> <sup>2+</sup> | NO <sub>2</sub> |
| 111-120     | LGFLHSGTAK                           | 515.78         | 515.72              | MH <sub>2</sub> <sup>2+</sup> | None            |
| 121-132     | SVTCTYSPALNK                         | 642.36         | 642.31              | MH <sub>2</sub> <sup>2+</sup> | None            |
| 140-156     | TCPVQLWVDSTPPPGTR                    | 618.57         | 618.58              | MH <sub>3</sub> <sup>3+</sup> | None            |
| 165-174     | QSQHMTEVVR                           | 607.79         | 607.82              | MH <sub>2</sub> <sup>2+</sup> | None            |
| 182-196     | CSDSDGLAPPQHLIR                      | 804.89         | 805.31              | MH <sub>2</sub> <sup>2+</sup> | None            |
| 203-213     | VEYLDDRNTFR                          | 714.35         | 714.38              | MH <sub>2</sub> <sup>2+</sup> | None            |
| 281-290     | DRRTEENLR                            | 659.32         | 658.80              | MH <sub>2</sub> <sup>2+</sup> | None            |
| 291-305     | KKGEPHHELPPGSTK                      | 547.97         | 547.95              | MH <sub>3</sub> <sup>3+</sup> | None            |
| 293-305     | GEPHHELPPGSTK                        | 693.34         | 693.38              | MH <sub>2</sub> <sup>2+</sup> | None            |
| 307-319     | ALPNNTSSSPQPK                        | 670.84         | 670.87              | MH <sub>2</sub> <sup>2+</sup> | None            |
| 320-333     | KKPLDGEYFTLQIR                       | 569.98         | 569.92              | MH <sub>3</sub> <sup>3+</sup> | None            |
| 320-333     | KKPLDGEY*FTLQIR                      | 569.98         | 585.31 <sup>#</sup> | MH <sub>3</sub> <sup>3+</sup> | NO <sub>2</sub> |
| 336-342     | ERFEMFR                              | 507.74         | 507.77              | MH <sub>2</sub> <sup>2+</sup> | None            |
| 343-351     | ELNEALELK                            | 529.79         | 529.81              | MH <sub>2</sub> <sup>2+</sup> | None            |

\* - Modified amino acid;

# - Mass is consistent with Tyrosine nitration.

**Table S2.** HINT score calculations for interactions of Tyr 327 of chain A with chain C before and after nitration. Only interaction scores over 10 are shown. Interactions with NO group are in red.

**Before Nitration**

| Residue | Residue Atom | Tyr Atom | Interaction Score | Interaction Type |
|---------|--------------|----------|-------------------|------------------|
| GLN331  | OE1          | CB       | -16               | Hydroph./Polar   |
| GLN331  | OE1          | CD2      | 11                | Hydrogen Bond    |
| ILE332  | O            | O        | -13               | Base/Base        |

**Total HINT Score 57**

**After Nitration**

| Residue | Residue Atom | nitroTyr Atom | Interaction Score | Interaction Type |
|---------|--------------|---------------|-------------------|------------------|
| GLN331  | O            | ON            | -14               | Base/Base        |
| GLN331  | CG           | ON            | -13               | Hydroph./Polar   |
| GLN331  | OE1          | NZ            | -24               | Base/Base        |
| GLN331  | OE1          | ON            | -39               | Base/Base        |
| GLN331  | OE1          | CB            | -23               | Hydroph./Polar   |
| GLN331  | NE2          | NZ            | 87                | Hydrogen Bond    |
| GLN331  | NE2          | ON            | 43                | Acid/Base        |
| GLN331  | NE2          | ON            | 184               | Hydrogen Bond    |
| GLN331  | NE2          | OH            | 22                | Acid/Base        |
| ILE332  | O            | O             | -13               | Base/Base        |
| ARG333  | N            | ON            | 15                | Acid/Base        |
| ARG333  | CB           | NZ            | 16                | Hydrophobic      |
| ARG333  | CB           | ON            | -10               | Hydroph./Polar   |
| ARG333  | CB           | OH            | -10               | Hydroph./Polar   |
| ARG333  | CG           | OH            | -12               | Hydroph./Polar   |
| ARG333  | CD           | OH            | -19               | Hydroph./Polar   |
| ARG333  | NE           | NZ            | 109               | Hydrogen Bond    |
| ARG333  | NE           | ON            | 133               | Hydrogen Bond    |
| ARG333  | NE           | ON            | 52                | Acid/Base        |
| ARG333  | NE           | OH            | 363               | Hydrogen Bond    |
| ARG333  | CZ           | OH            | -16               | Base/Base        |
| ARG333  | NH1          | ON            | 12                | Acid/Base        |
| ARG333  | NH1          | OH            | 41                | Acid/Base        |
| ARG333  | NH2          | NZ            | 64                | Acid/Base        |
| ARG333  | NH2          | ON            | 192               | Hydrogen Bond    |
| ARG333  | NH2          | ON            | 26                | Acid/Base        |
| ARG333  | NH2          | OH            | 457               | Hydrogen Bond    |

**Total HINT Score 1688**
